# Supplementary material for: Cadmium-113 NMR studies on homoleptic complexes containing thioether ligands: the crystal structures of [Cd([12]aneS4)2](ClO4)2, [Cd([18]aneS4N2)](PF6)2 and [Cd([9]aneS3)2](PF6)2
Source: Royal Society of Chemistry journal article supplement (doi:10.1039/b601665k), 2006-01-01

Supplemental Material. NMR Data and Figures.

Figure 1. Two diastereoisomers for octahedral *racemic*  $[M([18]aneS_4N_2)]^{n+}$  complexes.

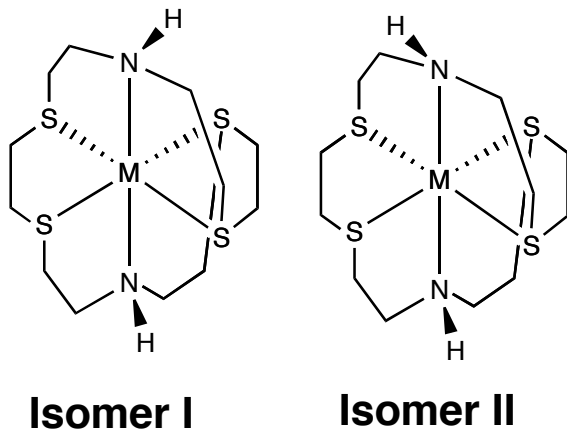

Figure 2. Representative  $^{113}Cd\{^1H\}$ -NMR spectrum of  $[Cd([10]aneS_3)_2](ClO_4)_2$  in  $CD_3NO_2$  at  $25^\circ C$ .

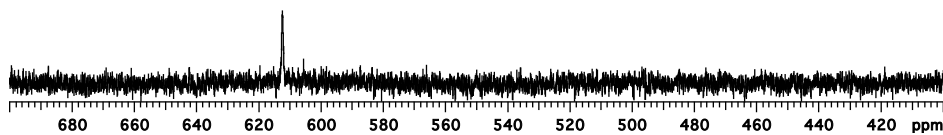

Figure 3.  $^{113}Cd\{^1H\}$ -NMR spectrum of  $[Cd([9]aneN_3)_2](ClO_4)_2$  in  $CD_3NO_2$  at  $25^\circ C$ . Note single resonance consistent with the presence of one diastereoisomer.

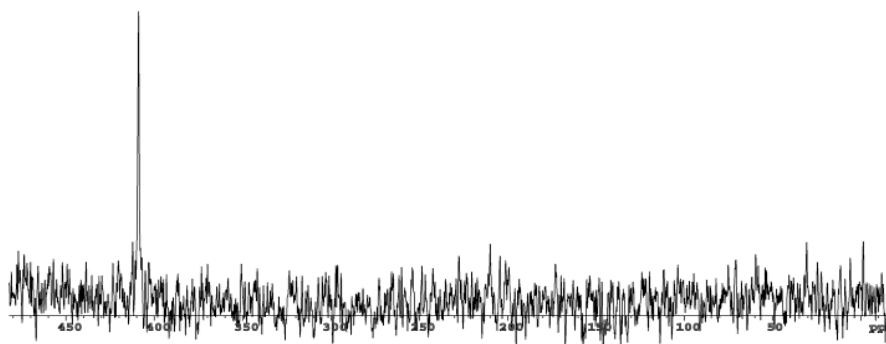

Figure 4. Variable temperature  $^1\text{H}$ -NMR spectra of  $[\text{Cd}([\text{12}]\text{aneS}_4)_x](\text{ClO}_4)_2$  in  $\text{CD}_3\text{NO}_2$ .

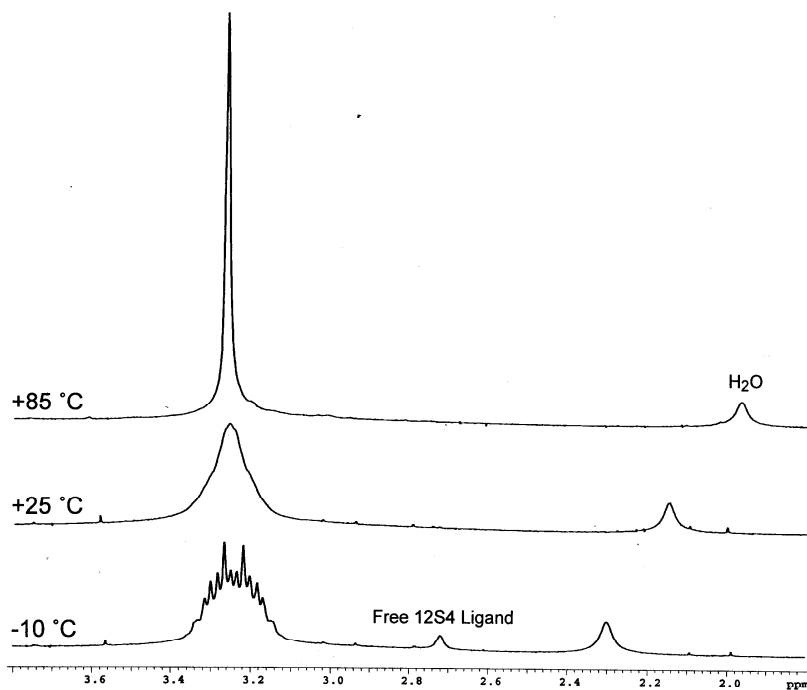

Figure 5.  $^1\text{H}$  NMR spectrum of  $[\text{Cd}([\text{18}]\text{aneS}_4\text{N}_2)](\text{PF}_6)_2$  in  $\text{CD}_3\text{NO}_2$  at  $25\text{ }^\circ\text{C}$ .

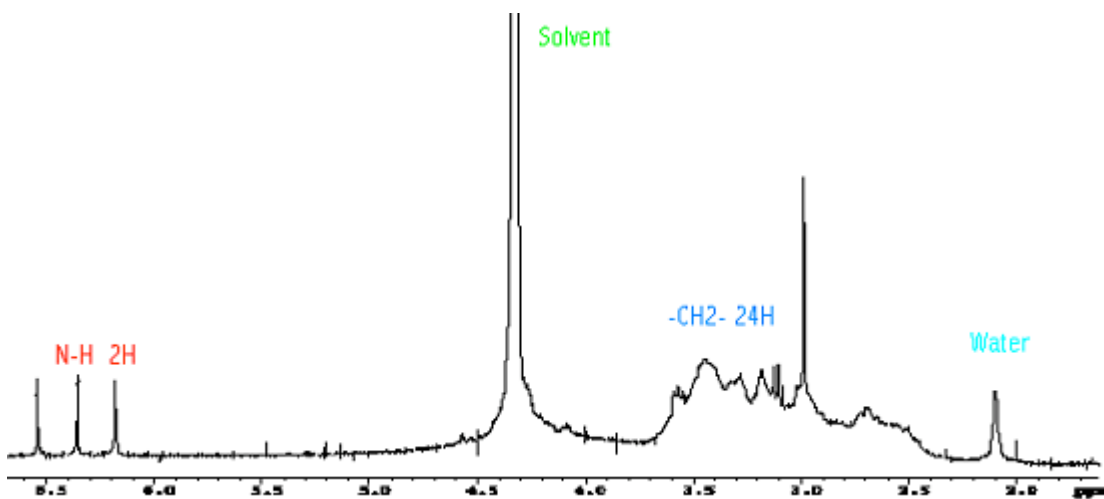

Supplement: b601665k.pdf [file b601665k.pdf]
